# Supplementary material for: A bimetallic nanoantenna for directional colour routing
Source: PubMed Central journal article supplement — Nat Commun. 2011 Sep 20;2:481–. doi: 10.1038/ncomms1490 (PMC3195252; doi:10.1038/ncomms1490), 2011-09-20
Supplement: ncomms1490-s1.pdf [file ncomms1490-s1.pdf]

**Supplementary information for "A Bimetallic  
Nanoantenna for Directional Colour Routing"**

by Timur Shegai, Si Chen, Vladimir D. Miljković, Gülis Zengin, Peter Johansson, and

Mikael Käll.

## Greens' function calculations.

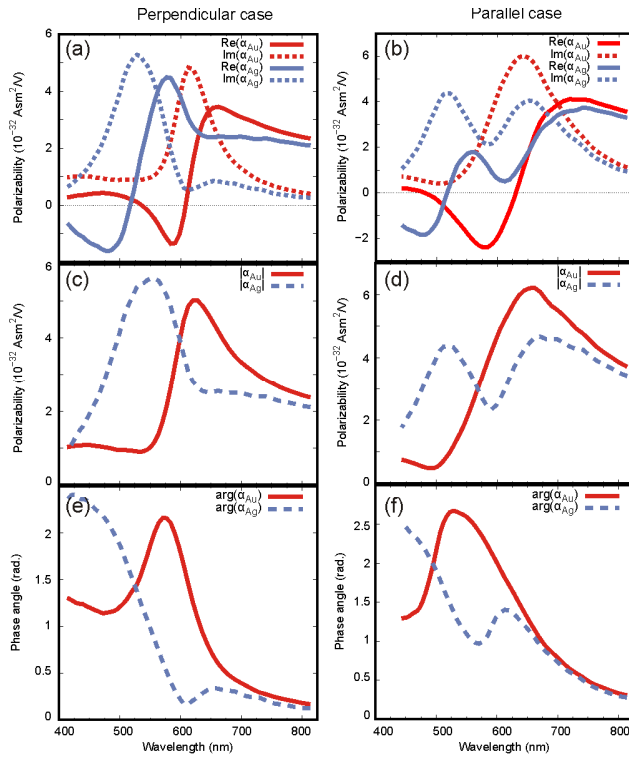

**Supplementary Figure S1.** Magnitudes and phases of dipoles extracted from Greens' function calculations of Au-Ag dimers for perpendicular and parallel polarization cases. (a-b) Real and imaginary parts of gold and silver polarizabilities, defined as  $\alpha=p/E_{\text{ext}}$ , where  $p$  is the in-plane dipole moment and  $E_{\text{ext}}$  is the external electric field. (c-d) Absolute values of polarizabilities. (e-f) Phases calculated as arguments of complex valued polarizabilities.
